# Supplementary material for: Anthraquinones from the Aerial Parts of Rubia cordifolia with Their NO Inhibitory and Antibacterial Activities
Source: MDPI journal article supplement (doi:10.3390/molecules27051730), 2022-03-07
Supplement: s1 [file s1]

# **Anthraquinones from the aerial parts of *Rubia cordifolia* with their NO inhibitory and antibacterial activities**

Han Luo<sup>1</sup>, Wei Qin<sup>1</sup>, Hong Zhang<sup>1</sup>, Fu-Cai Ren<sup>3</sup>, Wen-Tao Fang<sup>1</sup>, Qing-Hua Kong<sup>2</sup>,

Jian-Mei Zhang<sup>2</sup>, Cheng-Wu Fang<sup>1</sup>, Jiang-Miao Hu<sup>2\*</sup>, Shou-Jin Liu<sup>1\*</sup>

<sup>1</sup> *College of Pharmacy, Anhui University of Chinese Medicine, Hefei 230011, China;*

<sup>2</sup> *State Key Laboratory of Phytochemistry and Plant Resources in West China, Kunming Institute of Botany, Chinese Academy of Sciences, Kunming 650201, China.*

<sup>3</sup> *College of Pharmacy, Anhui Medical University, Hefei 230011, China.*

[\*Corresponding author] E-mails: hujiangmiao@mail.kib.ac.cn (Hu Jiang-Miao); shjinliu@sina.com (Liu Shou-Jin)

| <b>List of supplementary material</b> |                                                                           | <b>Pages</b> |
|---------------------------------------|---------------------------------------------------------------------------|--------------|
| <b>Figure S1</b>                      | <sup>1</sup> H, <sup>13</sup> C and HMBC NMR spectra of compound <b>1</b> | 1            |
| <b>Figure S2</b>                      | <sup>1</sup> H, <sup>13</sup> C and HMBC NMR spectra of compound <b>2</b> | 2            |
| <b>Figure S3</b>                      | <sup>1</sup> H, <sup>13</sup> C and HMBC NMR spectra of compound <b>3</b> | 4            |
| <b>Figure S4</b>                      | <sup>1</sup> H, <sup>13</sup> C and HMBC NMR spectra of compound <b>4</b> | 5            |

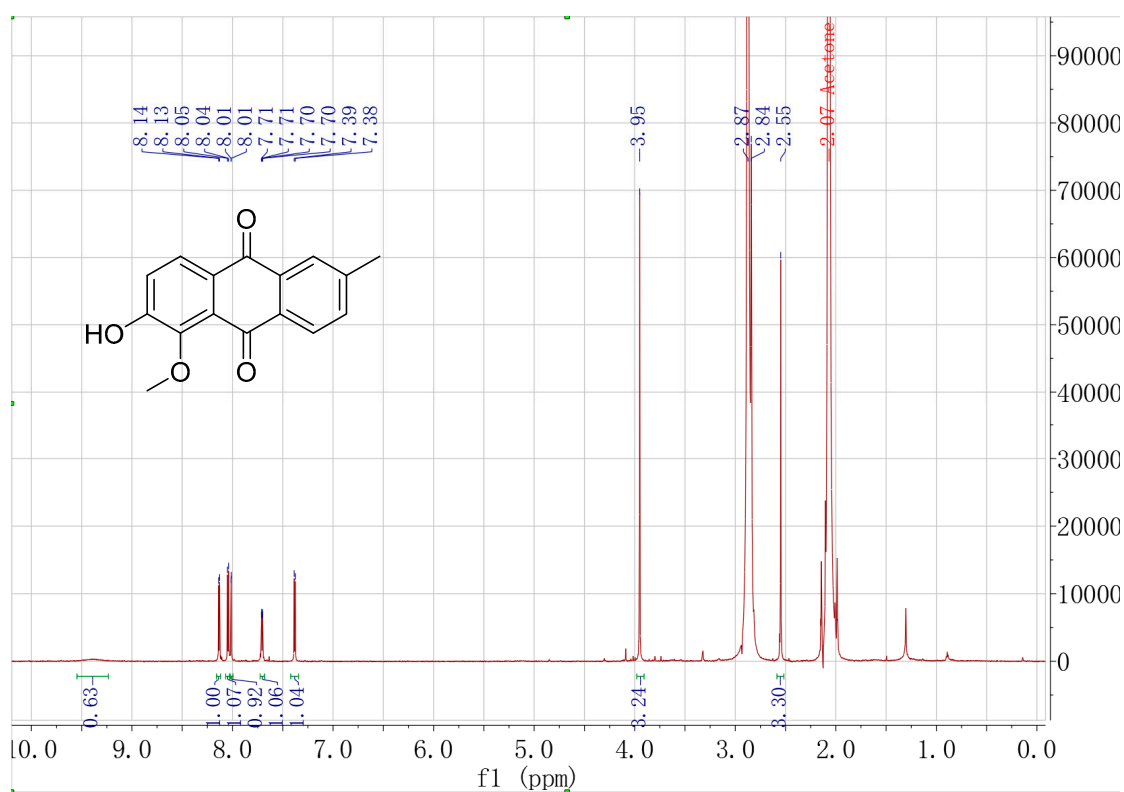

**Figure S1-1.** <sup>1</sup>H NMR spectrum of compound 1

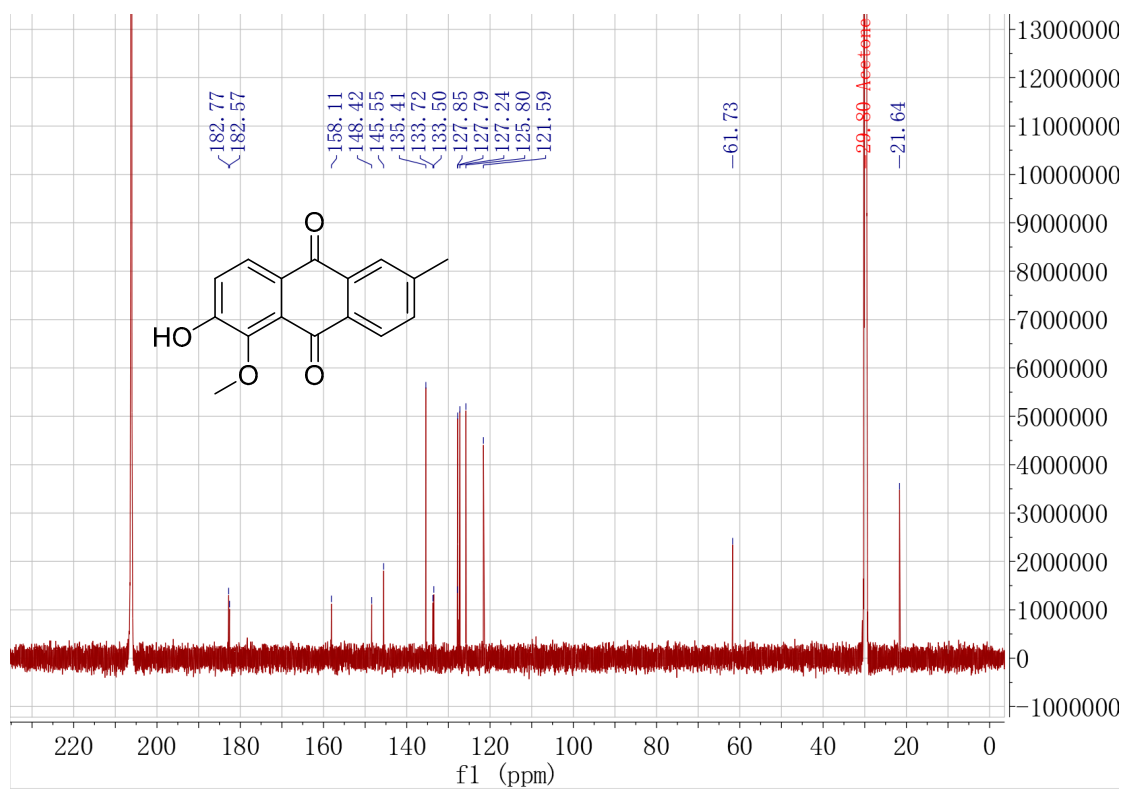

**Figure S1-2.** <sup>13</sup>C NMR spectrum of compound 1

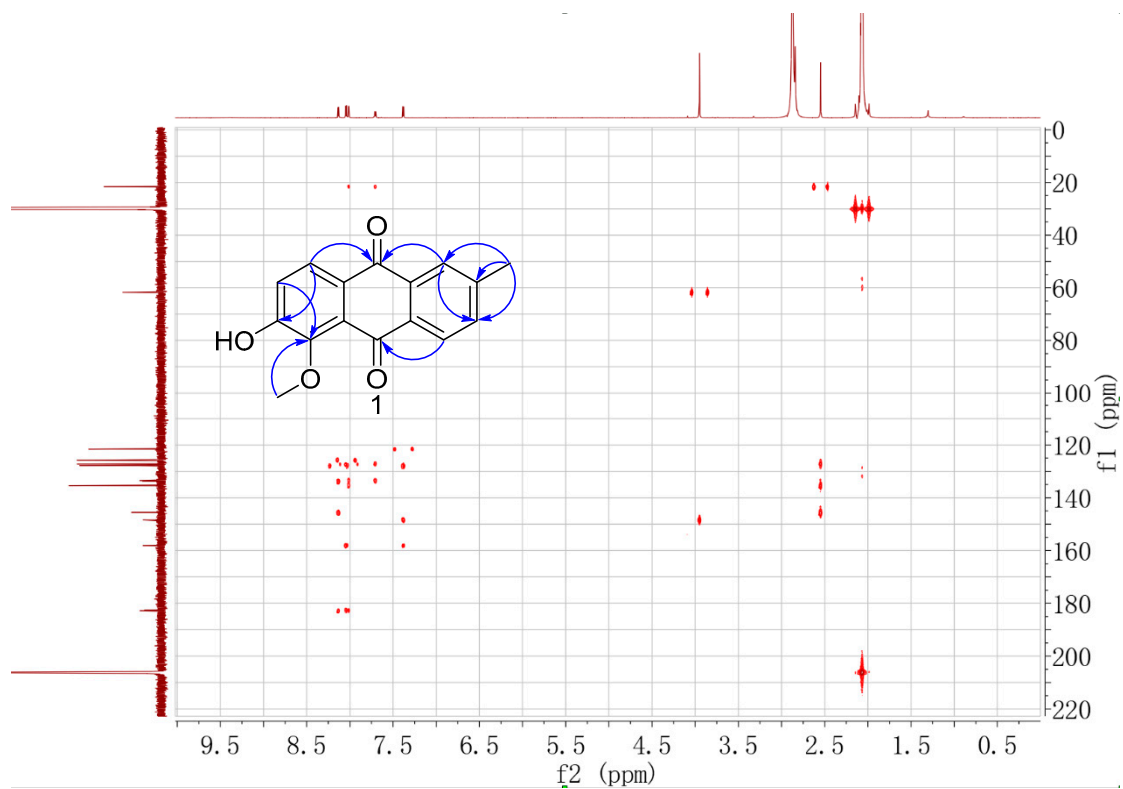

**Figure S1-3.** HMBC NMR spectrum of compound 1

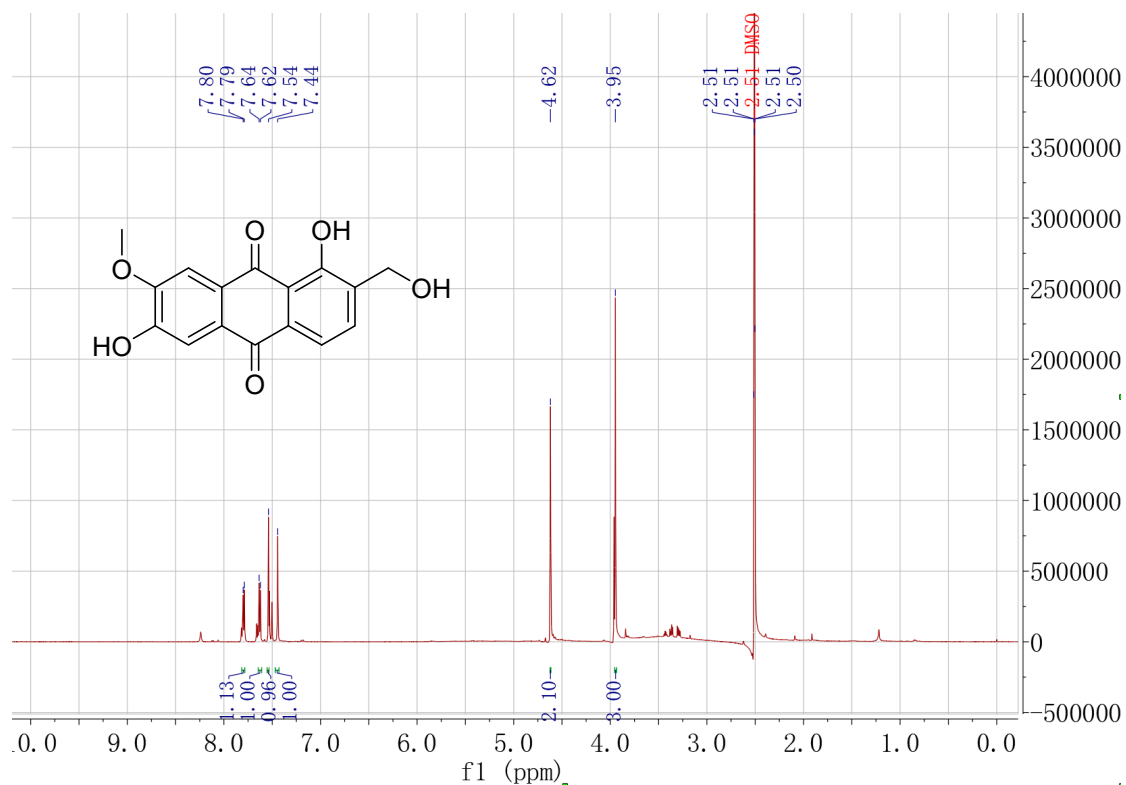

**Figure S2-1.**  $^1\text{H}$  NMR spectrum of compound 2

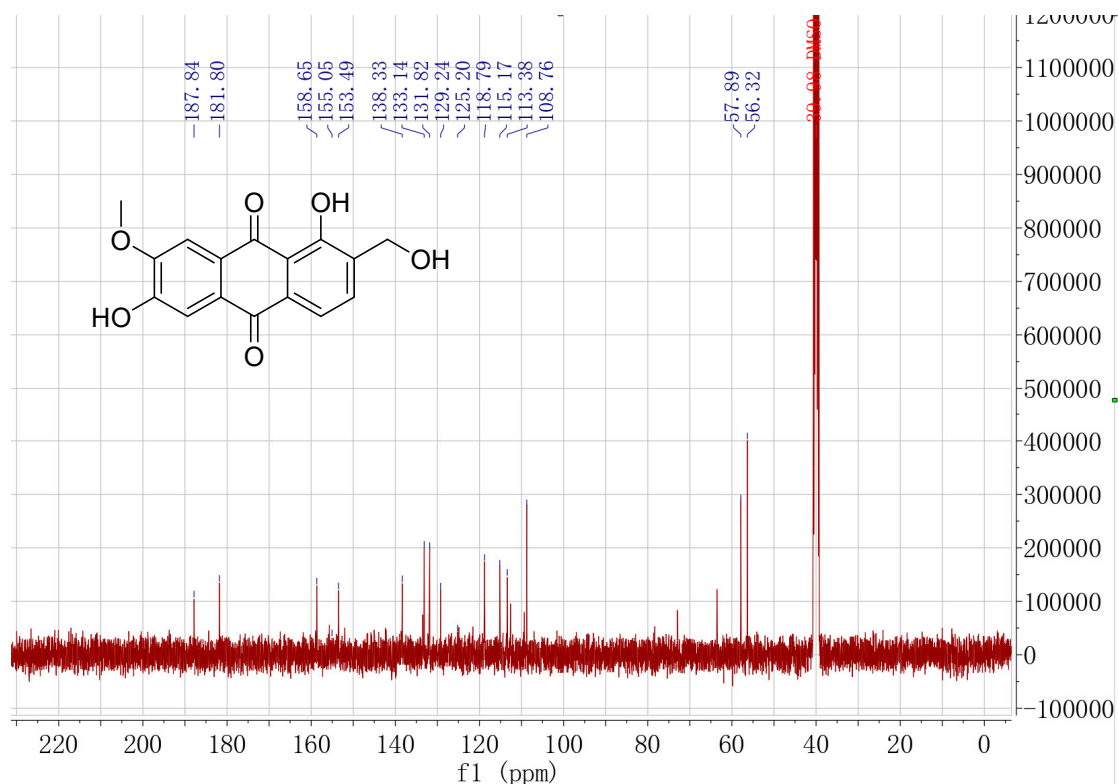

**Figure S2-2.**  $^{13}\text{C}$  NMR spectrum of compound **2**

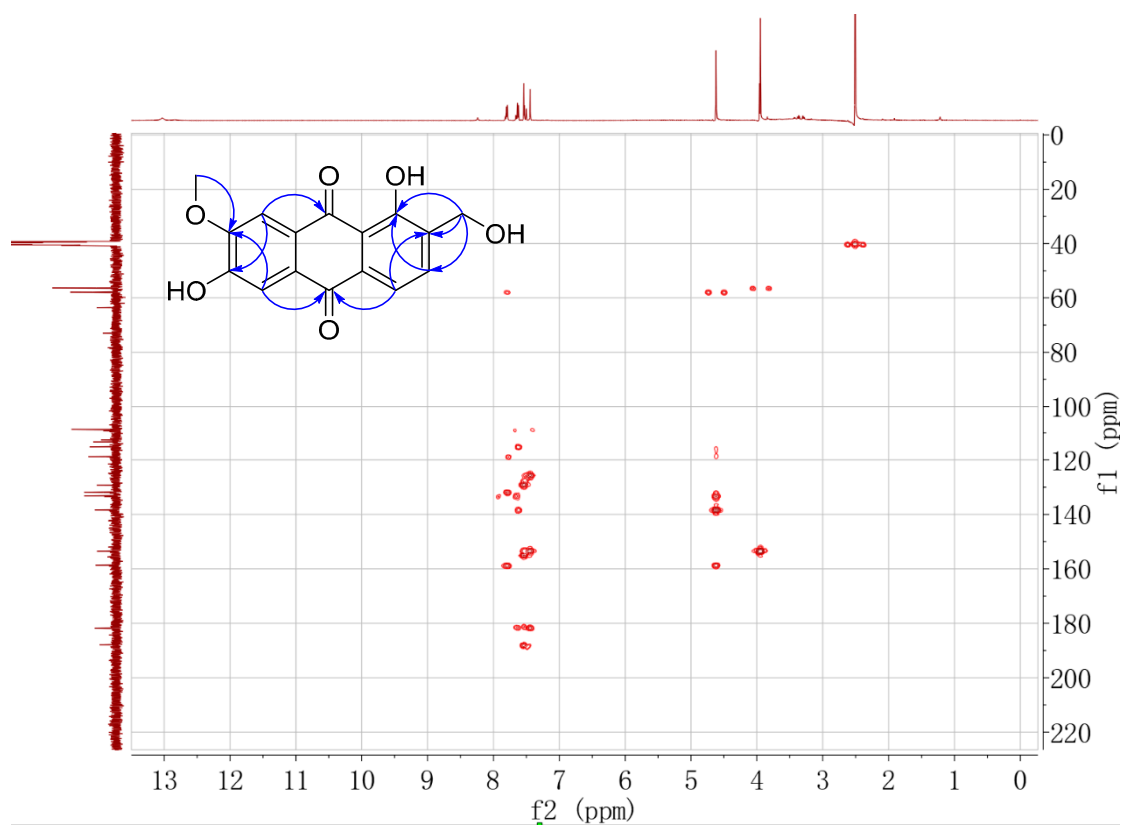

**Figure S2-3.** HMBC NMR spectrum of compound **2**

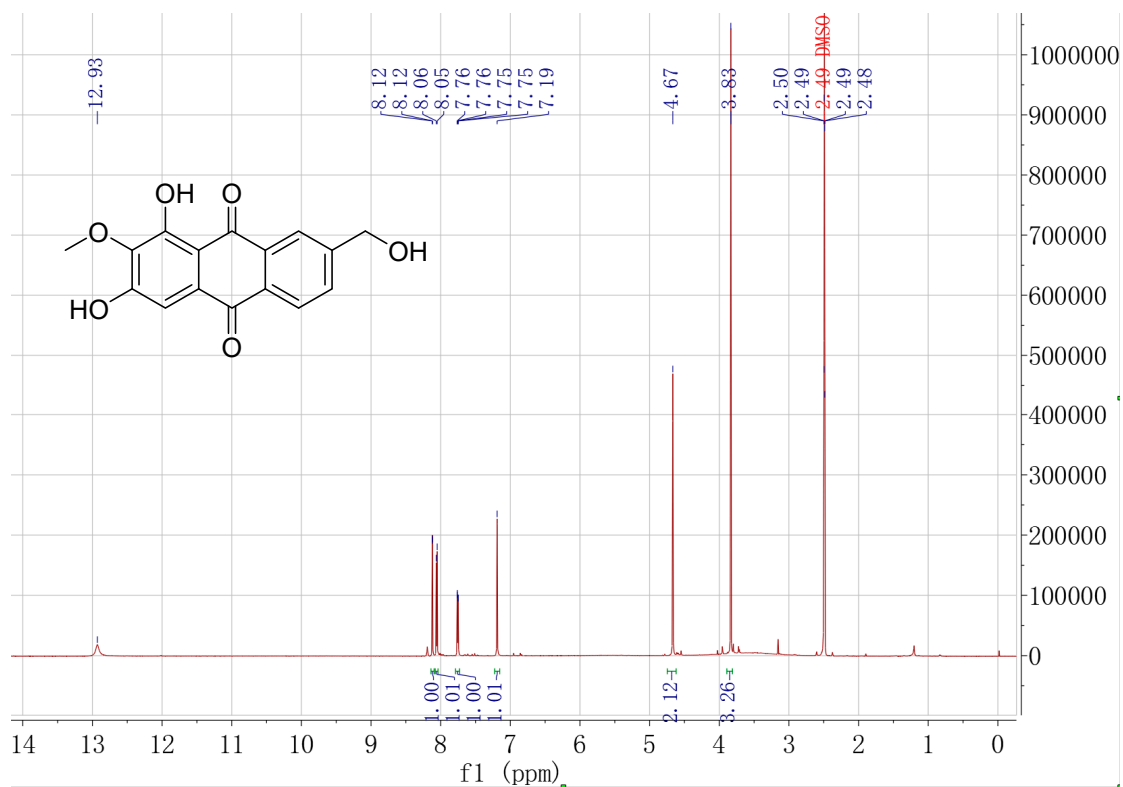

Figure S3-1. <sup>1</sup>H NMR spectrum of compound 3

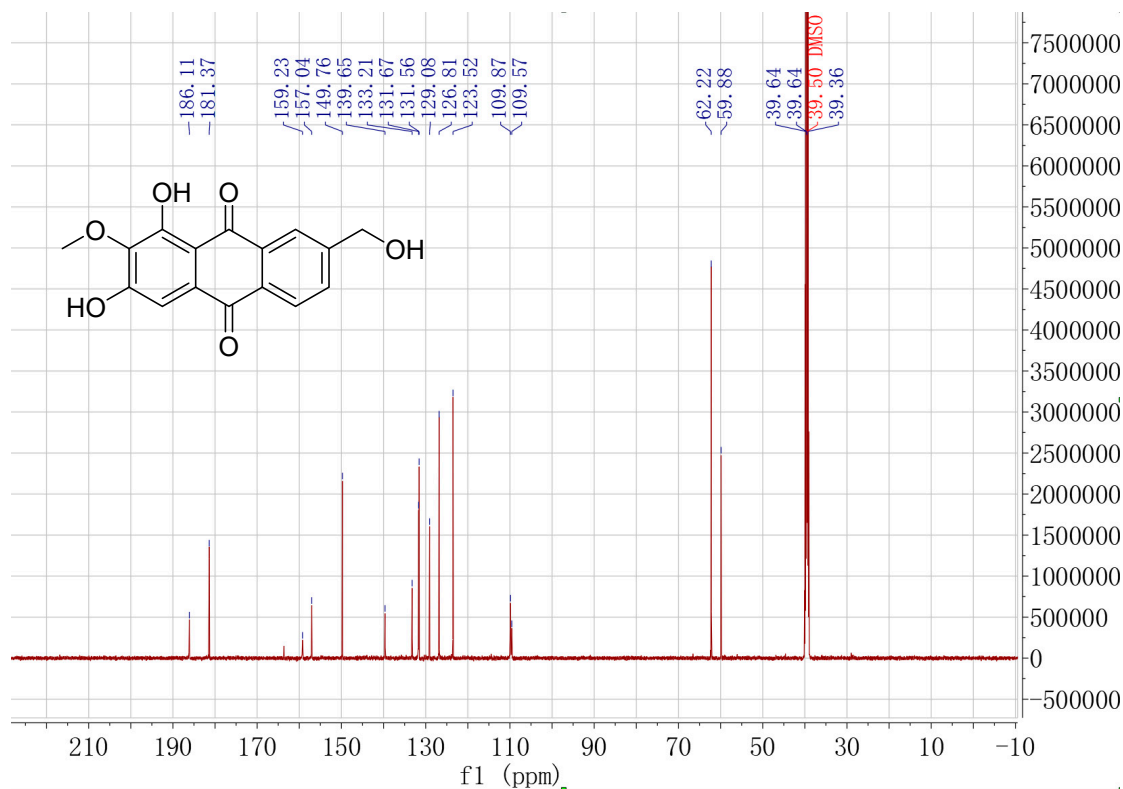

Figure S3-2. <sup>13</sup>C NMR spectrum of compound 3

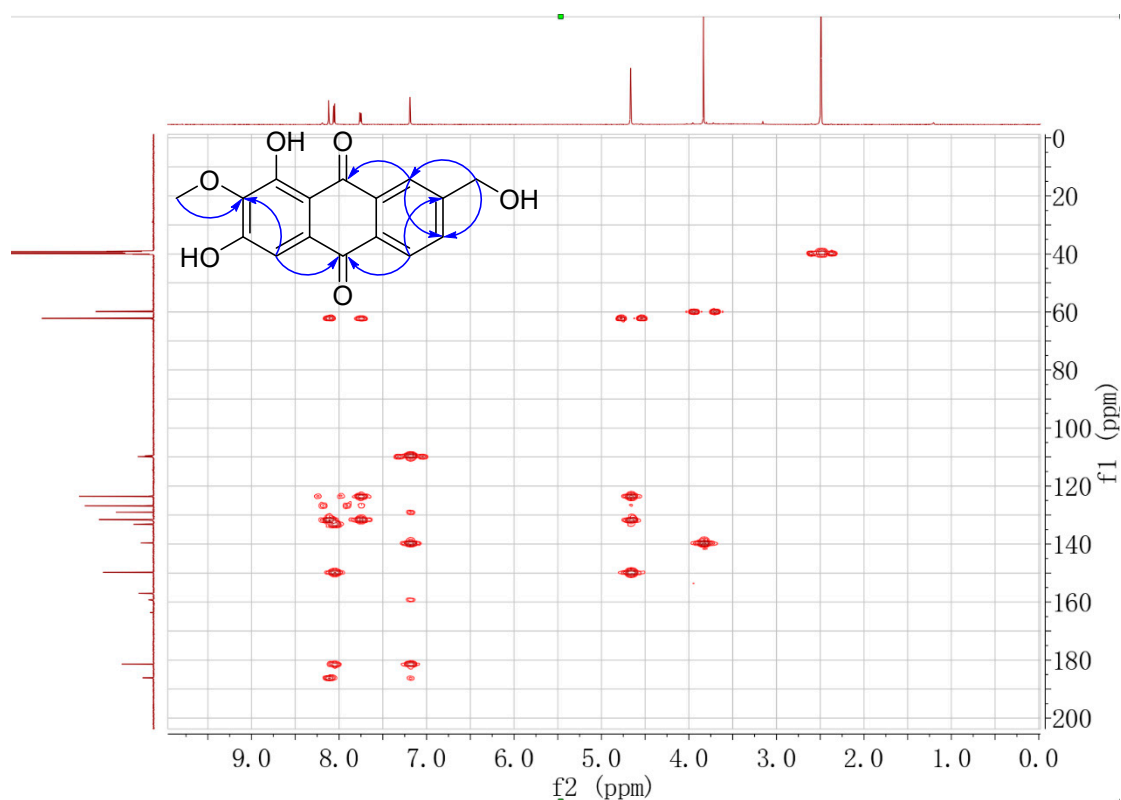

**Figure S3-3.** HMBC NMR spectrum of compound **3**

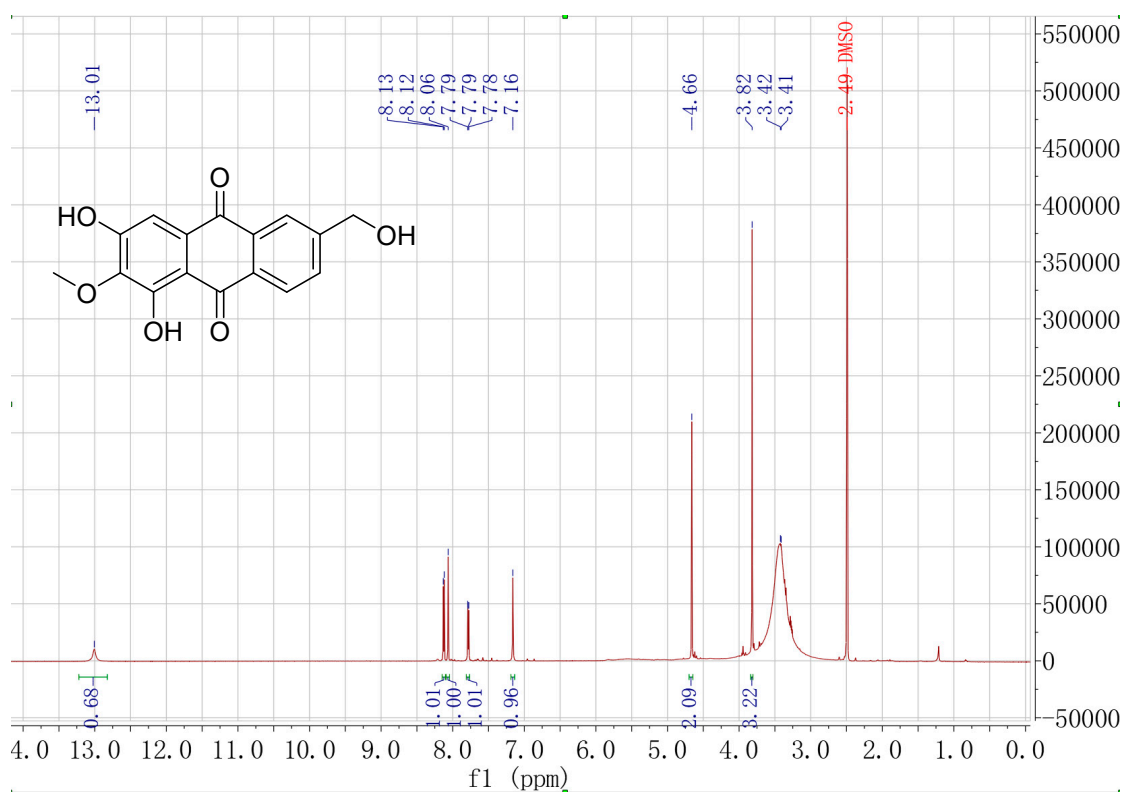

**Figure S4-1.**  $^1\text{H}$  NMR spectrum of compound **4**

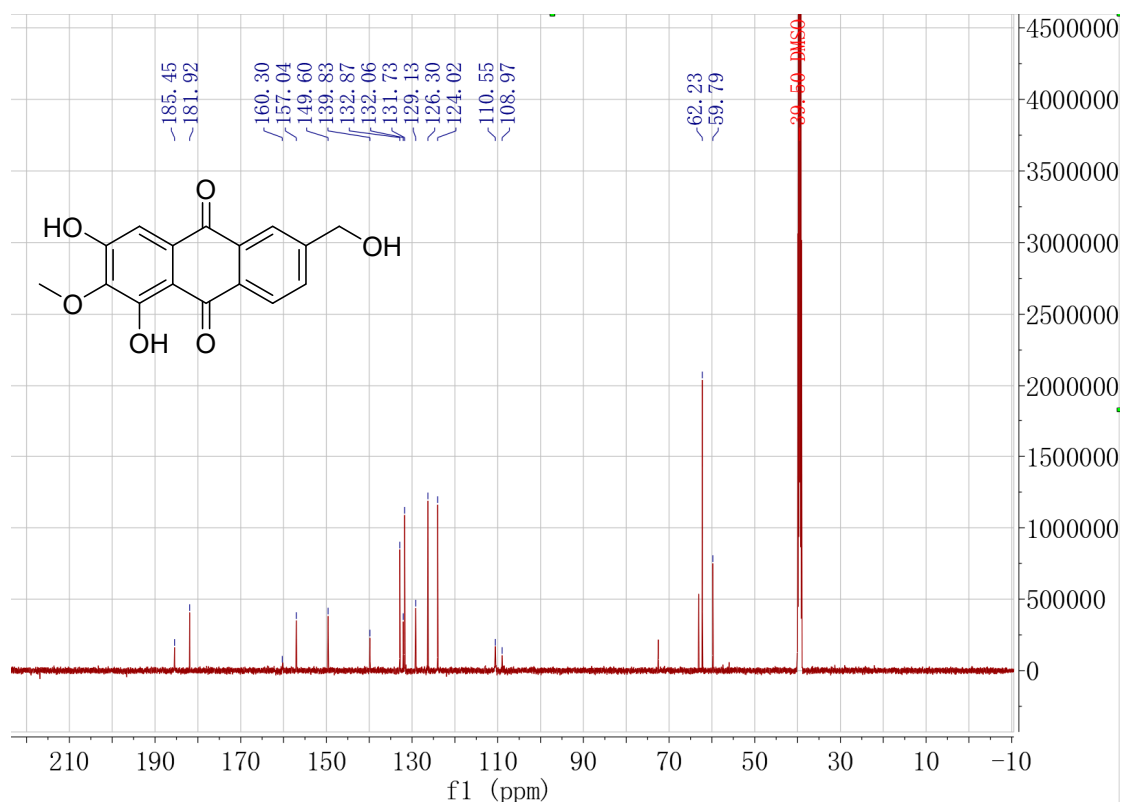

Figure S4-2. <sup>13</sup>C NMR spectrum of compound 4

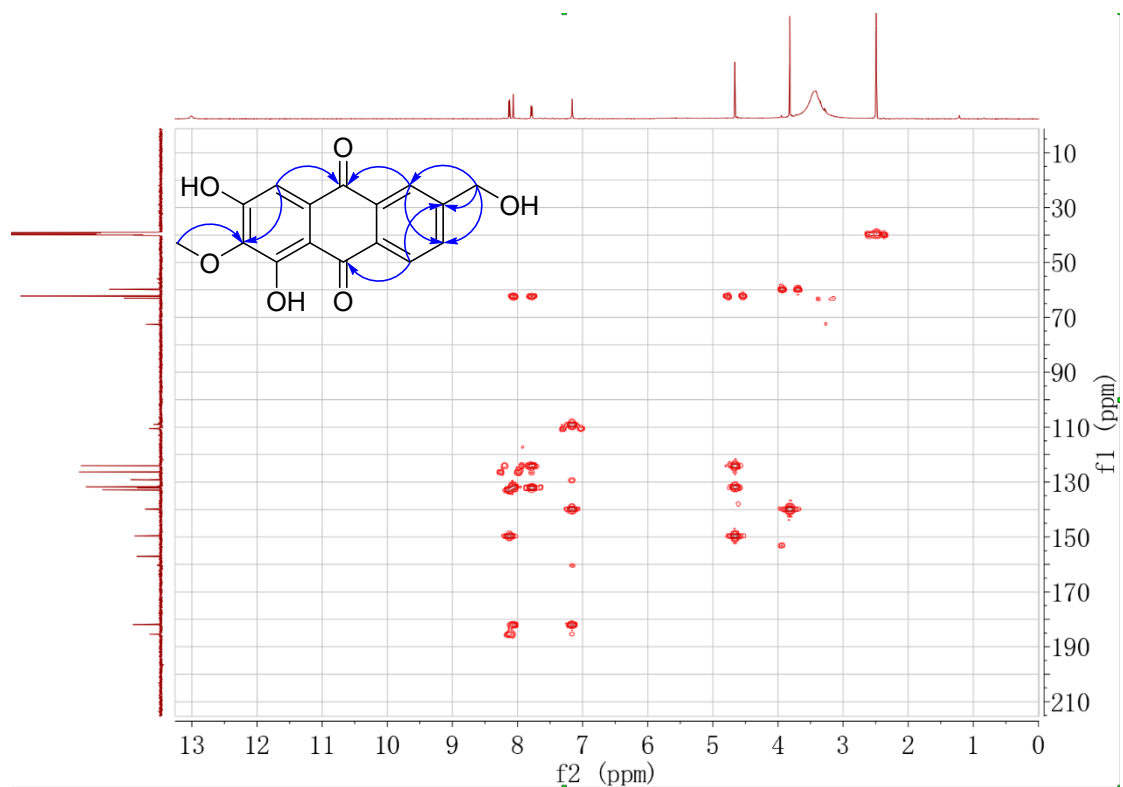

Figure S4-3. HMBC NMR spectrum of compound 4
